# Supplementary material for: Efficacy and Safety of Antiretroviral Therapy Initiated One Week after Tuberculosis Therapy in Patients with CD4 Counts < 200 Cells/μL: TB-HAART Study, a Randomized Clinical Trial
Source: PubMed Central journal article supplement (PMC4429073; doi:10.1371/journal.pone.0122587), 2015-05-12
Supplement: pone.0122587.s001.pdf [file pone.0122587.s001.pdf]

|                                                      |     |                                                                                                                                                   |                                           |
|------------------------------------------------------|-----|---------------------------------------------------------------------------------------------------------------------------------------------------|-------------------------------------------|
|                                                      |     | assessing outcomes) and how                                                                                                                       |                                           |
|                                                      | 11b | If relevant, description of the similarity of interventions                                                                                       |                                           |
| Statistical methods                                  | 12a | Statistical methods used to compare groups for primary and secondary outcomes                                                                     | Sample size & statistical analysis        |
|                                                      | 12b | Methods for additional analyses, such as subgroup analyses and adjusted analyses                                                                  | Sample size & statistical analysis        |
| <b>Results</b>                                       |     |                                                                                                                                                   |                                           |
| Participant flow (a diagram is strongly recommended) | 13a | For each group, the numbers of participants who were randomly assigned, received intended treatment, and were analysed for the primary outcome    | Study participants and recruitment        |
|                                                      | 13b | For each group, losses and exclusions after randomisation, together with reasons                                                                  | Figure 1                                  |
| Recruitment                                          | 14a | Dates defining the periods of recruitment and follow-up                                                                                           | Study design and oversight                |
|                                                      | 14b | Why the trial ended or was stopped                                                                                                                | Study design and oversight                |
| Baseline data                                        | 15  | A table showing baseline demographic and clinical characteristics for each group                                                                  | Table 1                                   |
| Numbers analysed                                     | 16  | For each group, number of participants (denominator) included in each analysis and whether the analysis was by original assigned groups           | Figure 2 and Table 4                      |
| Outcomes and estimation                              | 17a | For each primary and secondary outcome, results for each group, and the estimated effect size and its precision (such as 95% confidence interval) | Primary End Point and Secondary End Point |
|                                                      | 17b | For binary outcomes, presentation of both absolute and relative effect sizes is recommended                                                       | Tables 2 and 3                            |
| Ancillary analyses                                   | 18  | Results of any other analyses performed, including subgroup analyses and adjusted analyses, distinguishing pre-specified from exploratory         | Table 2                                   |
| Harms                                                | 19  | All important harms or unintended effects in each group (for specific guidance see CONSORT for harms)                                             | Primary and Secondary End Points          |
| <b>Discussion</b>                                    |     |                                                                                                                                                   |                                           |
| Limitations                                          | 20  | Trial limitations, addressing sources of potential bias, imprecision, and, if relevant, multiplicity of analyses                                  | Discussion, paragraph 7                   |
| Generalisability                                     | 21  | Generalisability (external validity, applicability) of the trial findings                                                                         | Discussion, paragraph 8                   |
| Interpretation                                       | 22  | Interpretation consistent with results, balancing benefits and harms, and considering other relevant evidence                                     | Discussion, paragraph 8                   |
| <b>Other information</b>                             |     |                                                                                                                                                   |                                           |
| Registration                                         | 23  | Registration number and name of trial registry                                                                                                    | Abstract                                  |
| Protocol                                             | 24  | Where the full trial protocol can be accessed, if available                                                                                       |                                           |
| Funding                                              | 25  | Sources of funding and other support (such as supply of drugs), role of funders                                                                   | Acknowledgement                           |

\*We strongly recommend reading this statement in conjunction with the CONSORT 2010 Explanation and Elaboration for important clarifications on all the items. If relevant, we also recommend reading CONSORT extensions for cluster randomised trials, non-inferiority and equivalence trials, non-pharmacological treatments, herbal interventions, and pragmatic trials. Additional extensions are forthcoming: for those and for up to date references relevant to this checklist, see [www.consort-statement.org](http://www.consort-statement.org).
